# Supplementary material for: Morphology-dependent enhancement of the electrochemical performance of CNF-guided tunable VS4 heterostructures for symmetric supercapacitors
Source: Royal Society of Chemistry journal article supplement (doi:10.1039/d3ta04138g), 2023-01-01
Supplement: d3ta04138g1.pdf [file d3ta04138g1.pdf]

## Morphology-dependent enhancement of the electrochemical performance of CNF-guided tunable VS<sub>4</sub> heterostructures for symmetric supercapacitors

Saad Zafar<sup>1</sup>, Arpit Thomas<sup>2</sup>, Soumyasri Nikhilesh Mahapatra<sup>1</sup>, Naiwrit Karmodak<sup>3</sup>, Harpreet Singh Arora<sup>2\*</sup>, Bimlesh Lochab<sup>1\*</sup>

<sup>1</sup>Materials Chemistry Laboratory, Department of Chemistry, School of Natural Sciences, Shiv Nadar Institution of Eminence, Gautam Buddha Nagar, Uttar Pradesh 201314, India.

<sup>2</sup>Surface and Tribology Laboratory, Department of Mechanical Engineering, School of Natural Science, Shiv Nadar Institution of Eminence, Gautam Buddha Nagar, Uttar Pradesh 201314, India.

<sup>3</sup>Computational Materials and Electrocatalysis Lab, Department of Chemistry, School of Natural Sciences, Shiv Nadar Institution of Eminence, Gautam Buddha Nagar, Uttar Pradesh 201314, India.

### Table of content:

**Figure S1.** Scanning electron microscopy (SEM) images of (a-b) VS<sub>4</sub>@CNF<sub>x</sub>, and (c-d) VS<sub>4</sub>@CNF<sub>3x</sub> at different magnifications.....S2

**Figure S2.** BJH pore size distribution curve of VS<sub>4</sub>@CNF<sub>x-3x</sub> composite.....S3

**Figure S3.** XPS (a) stacked spectra of VS<sub>4</sub> and VS<sub>4</sub>@CNF<sub>2x</sub>, and deconvoluted XPS peaks for VS<sub>4</sub> (b) V and (c) S, respectively.....S4

**Figure S4.** (a) CV curve of VS<sub>4</sub> at different scan rates, and (b) GCD curve of VS<sub>4</sub> at different current density.....S5

**Figure S5.** Calculating the slope *b* obtained by plotting log (*i*) vs log (*v*).....S5

**Figure S6.** The equivalent electrical circuit fit for VS<sub>4</sub>@CNF<sub>x</sub>, VS<sub>4</sub>@CNF<sub>2x</sub>, and VS<sub>4</sub>@CNF<sub>3x</sub>. ....S6

**Table S1.** EIS fitted parameters of VS<sub>4</sub>@CNF<sub>x</sub>, VS<sub>4</sub>@CNF<sub>2x</sub>, and VS<sub>4</sub>@CNF<sub>3x</sub> based SC....S6

**Table S2.** Comparison of VS<sub>4</sub>@CNF<sub>2x</sub> electrode performance with the other reported materials. ....S7

**References.** ....S7

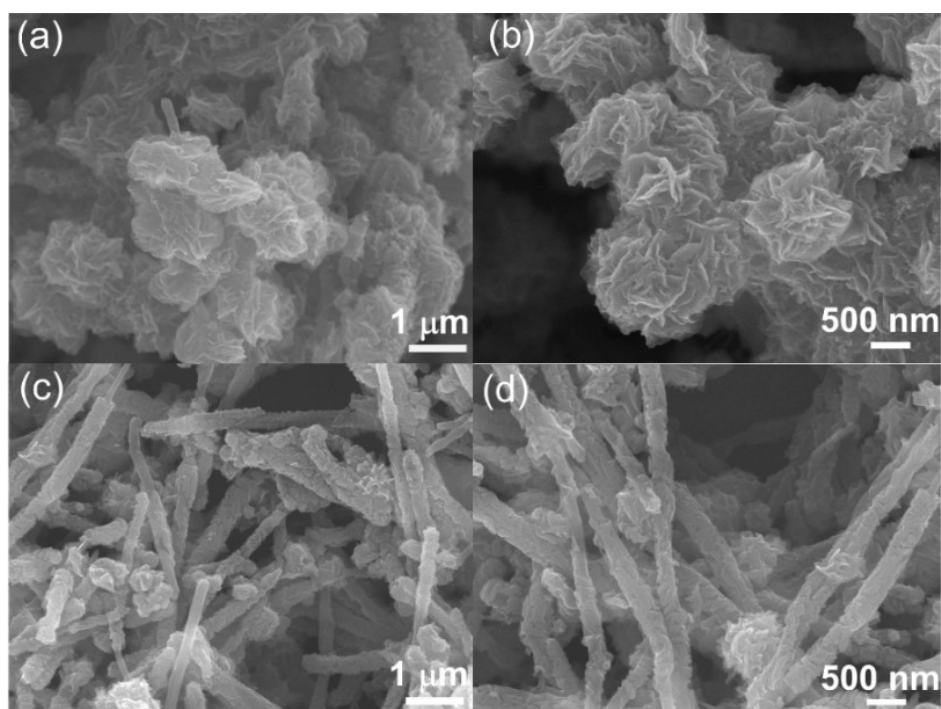

**Figure S1.** Scanning electron microscopy (SEM) images of (a-b)  $\text{VS}_4@\text{CNF}_x$ , and (c-d)  $\text{VS}_4@\text{CNF}_{3x}$  at different magnifications.

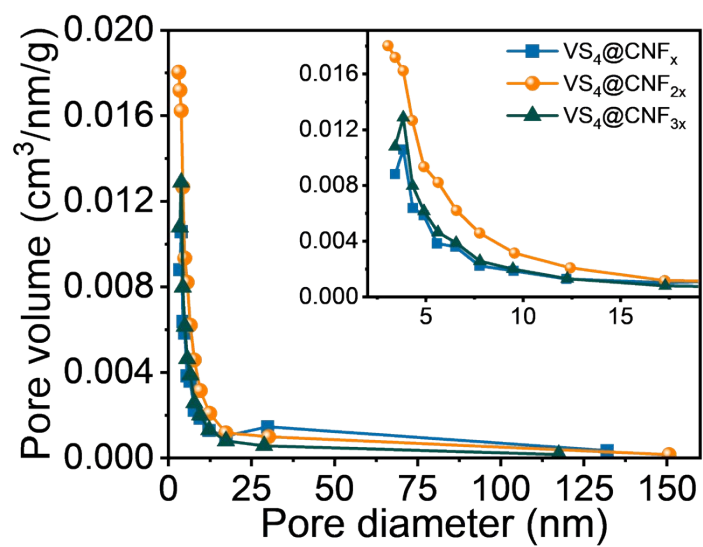

**Figure S2.** BJH pore size distribution curve of VS<sub>4</sub>@CNF<sub>x-3x</sub> composite.

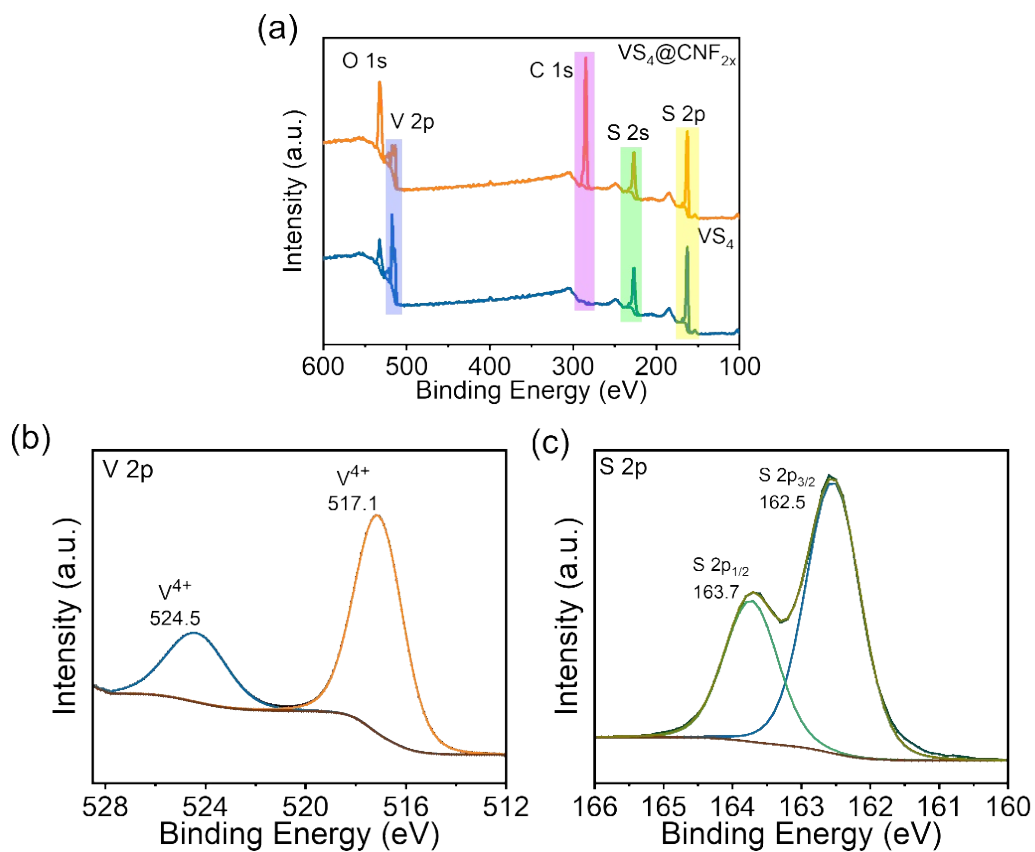

**Figure S3.** XPS (a) stacked spectra of VS<sub>4</sub> and VS<sub>4</sub>@CNF<sub>2x</sub>, and deconvoluted XPS peaks for VS<sub>4</sub> (b) V and (c) S, respectively.

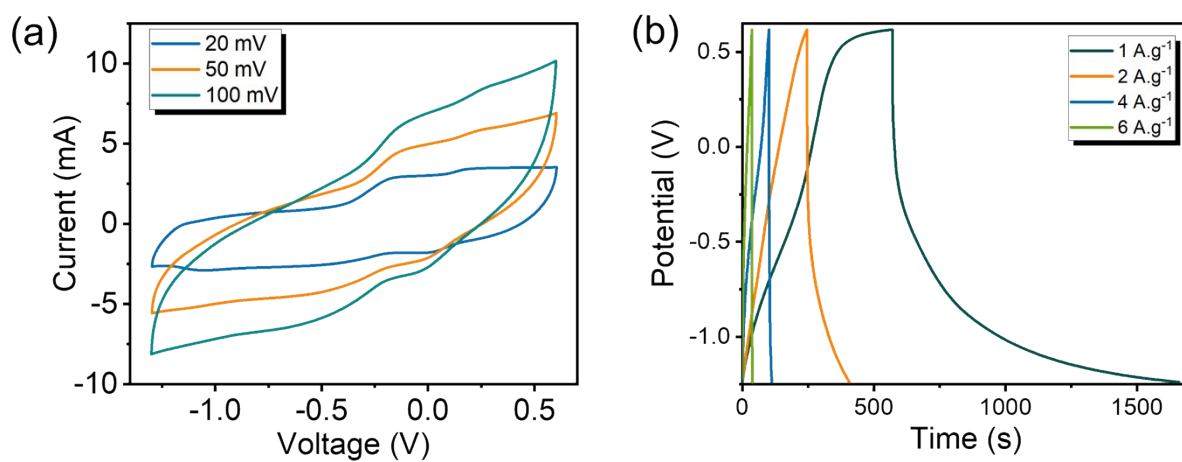

**Figure S4.** (a) CV curve of VS<sub>4</sub> at different scan rates, and (b) GCD curve of VS<sub>4</sub> at different current density.

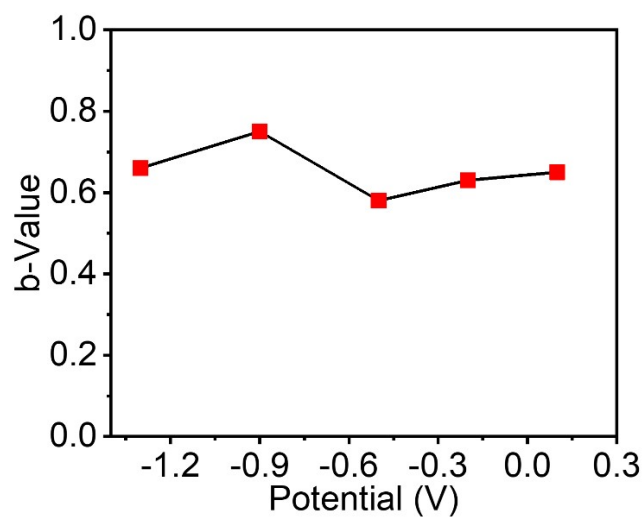

**Figure S5.** Calculating the slope  $b$  obtained by plotting  $\log(i)$  vs  $\log(v)$ .

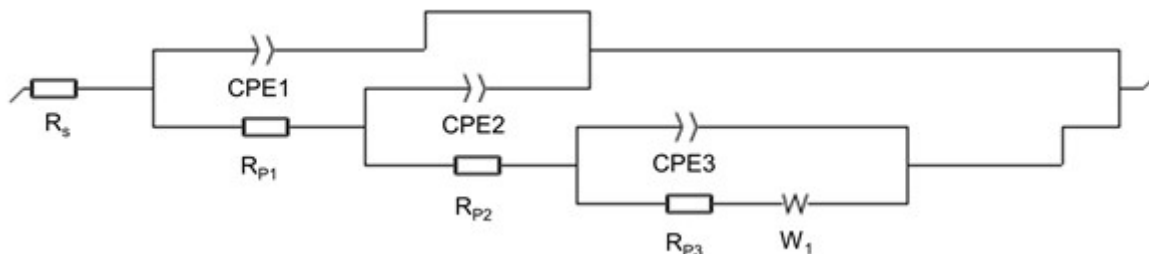

**Figure S6.** The equivalent electrical circuit fit for  $VS_4@CNF_x$ ,  $VS_4@CNF_{2x}$ , and  $VS_4@CNF_{3x}$ .

**Table S1.** EIS fitted parameters of  $VS_4@CNF_x$ ,  $VS_4@CNF_{2x}$ , and  $VS_4@CNF_{3x}$  based SC.

| Parameter       | $R_s$<br>(ohm) | $R_{p1}$<br>(ohm) | CPE1<br>( $S \times s^a$ )<br>$\times 10^{-3}$ | N1    | $R_{p2}$<br>(ohm) | CPE2<br>( $S \times s^a$ )<br>$\times 10^{-3}$ | N2    | $R_{p3}$<br>(ohm)<br>$\times 10^{-3}$ | CPE3<br>( $S \times s^a$ )<br>$\times 10^{-3}$ | N3    | $W_1$ |
|-----------------|----------------|-------------------|------------------------------------------------|-------|-------------------|------------------------------------------------|-------|---------------------------------------|------------------------------------------------|-------|-------|
| $VS_4@CNF_x$    | 5.359          | 0.998             | 0.782                                          | 0.701 | 24.06             | 185.7                                          | 0.637 | 1.496                                 | 207                                            | 1     | 0.095 |
| $VS_4@CNF_{2x}$ | 5.100          | 0.485             | 0.336                                          | 0.835 | 13.28             | 103.1                                          | 0.741 | 1.076                                 | 304                                            | 0.851 | 0.019 |
| $VS_4@CNF_{3x}$ | 5.274          | 1.295             | 0.391                                          | 0.508 | 24.81             | 204                                            | 0.705 | 4.32                                  | 238                                            | 0.932 | 0.029 |

**Table S2.** Comparison of VS<sub>4</sub>@CNF<sub>2x</sub> electrode performance with the other reported materials.

| Electrode Material                                             | Electrolyte                          | Specific Capacitance   | Retention (after Cycles) | Energy Density (W h kg <sup>-1</sup> ) | Power Density (W kg <sup>-1</sup> ) |
|----------------------------------------------------------------|--------------------------------------|------------------------|--------------------------|----------------------------------------|-------------------------------------|
| VS <sub>4</sub> nanorods <sup>1</sup>                          | 1 M LiNO <sub>3</sub>                | 617 F/g @ 0.4 A/g      | 87.5% (1500)             | 55                                     | -                                   |
| Hydrangea-like VS <sub>4</sub> microsphere <sup>2</sup>        | 1 M Na <sub>2</sub> SO <sub>3</sub>  | 533 F/g @ 0.1 A/g      | 80% (500)                | 60                                     | -                                   |
| Anemone-like VS <sub>4</sub> microsphere <sup>3</sup>          | 1 M LiNO <sub>3</sub>                | 617 F/g @ 0.4 A/g      | 87.5% (1500)             | 113.6                                  | 720                                 |
| Petal shape VS <sub>4</sub> /CNT <sup>4</sup>                  | 1 M LiClO <sub>4</sub>               | 330 F/g @ 1 A/g        | 63% (5000)               | 51.2                                   | 30.95                               |
| VS <sub>4</sub> /CNT/rGO <sup>5</sup>                          | 1 M LiClO <sub>4</sub> /PC           | 490.7 F/g @ 1 A/g      | 50% (2000)               | 72.07                                  | 14.69                               |
| VS <sub>4</sub> /CNTs/RGO <sup>6</sup>                         | 0.5 M K <sub>2</sub> SO <sub>4</sub> | 558.7 F/g @ 1 A/g      | 90% (1000)               | 174.6                                  | 13.85                               |
| NiS <sub>2</sub> @NiV <sub>2</sub> S <sub>4</sub> <sup>7</sup> | 6 M KOH                              | 520 C/g at 1 A/g       | 90% (10000)              | 19.4                                   | 140                                 |
| VS <sub>4</sub> /rGO <sup>8</sup>                              | 1 M Na <sub>2</sub> SO <sub>4</sub>  | 877 F/g @ 0.5 A/g      | 90% (1000)               | 117                                    | 20                                  |
| rGO-VS <sub>2</sub> -WS <sub>2</sub> <sup>9</sup>              | 3 M KOH                              | 220 F/g @ 1 A/g        | -                        | 30.55                                  | 355                                 |
| <b>VS<sub>4</sub>@CNF<sub>2x</sub> <sup>This work</sup></b>    | <b>1 M KOH</b>                       | <b>840 F/g @ 1 A/g</b> | <b>86% (5000)</b>        | <b>91</b>                              | <b>239</b>                          |

### References:

1. J.-K. Feng, J. Huang, H.-Y. Li and B. Xie, *Cham*, 2020.
2. Z.-W. Peng, K.-F. Jun, H.-Y. Li and B. Xie, *Cham*, 2019.
3. H.-Y. Li, J.-K. Feng, L. Xiang, J. Huang and B. Xie, *J. Power Sources*, 2020, **457**, 228031.
4. X. Wang, Y. Zhang, J. Zheng, X. Liu and C. Meng, *J. Colloid Interface Sci.*, 2019, **554**, 191-201.
5. X. Wang, Y. Zhang, J. Zheng, H. Jiang, X. Dong, X. Liu and C. Meng, *J. Colloid Interface Sci.*, 2020, **574**, 312-323.
6. S. Ratha, S. R. Marri, J. N. Behera and C. S. Rout, *Eur. J. Inorg. Chem.*, 2016, **2016**, 259-265.
7. R. Manikandan, C. J. Raj, K. H. Yu and B. C. Kim, *Appl. Surf. Sci.*, 2019, **497**, 143778.
8. S. Ratha, S. R. Marri, N. A. Lanzillo, S. Moshkalev, S. K. Nayak, J. Behera and C. S. Rout, *J. Mater. Chem. A*, 2015, **3**, 18874-18881.
9. S. S. Magdum, S. Thangarasu and T. H. Oh, *Inorganics*, 2022, **10**, 229.
